# Supplementary material for: High-efficiency magnetic refrigeration using holmium
Source: PubMed Central journal article supplement (PMC7896054; doi:10.1038/s41467-021-21234-z), 2021-02-19
Supplement: 41467_2021_21234_MOESM1_ESM.pdf [file 41467_2021_21234_MOESM1_ESM.pdf]

# High-Efficiency Magnetic Refrigeration Using Holmium

Noriki Terada and Hiroaki Mamiya

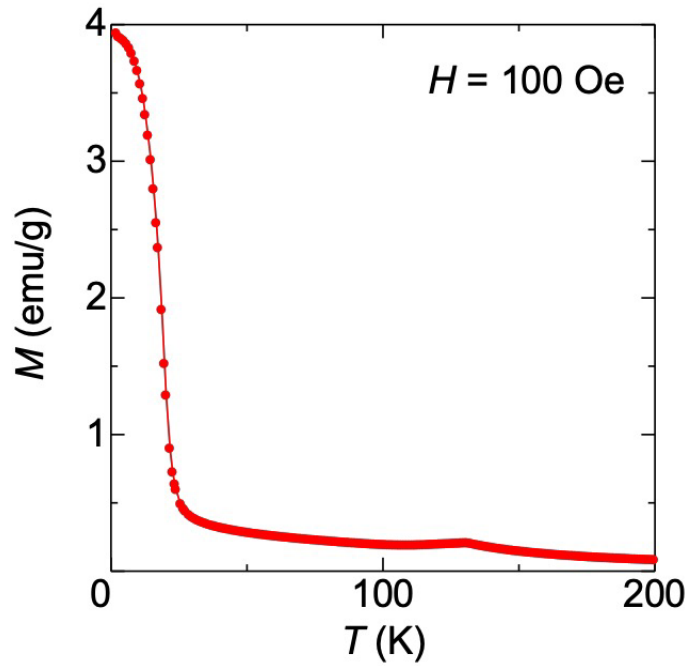

Supplementary Figure 1: Temperature dependence of magnetization in a magnetic field of 100 Oe in Ho.

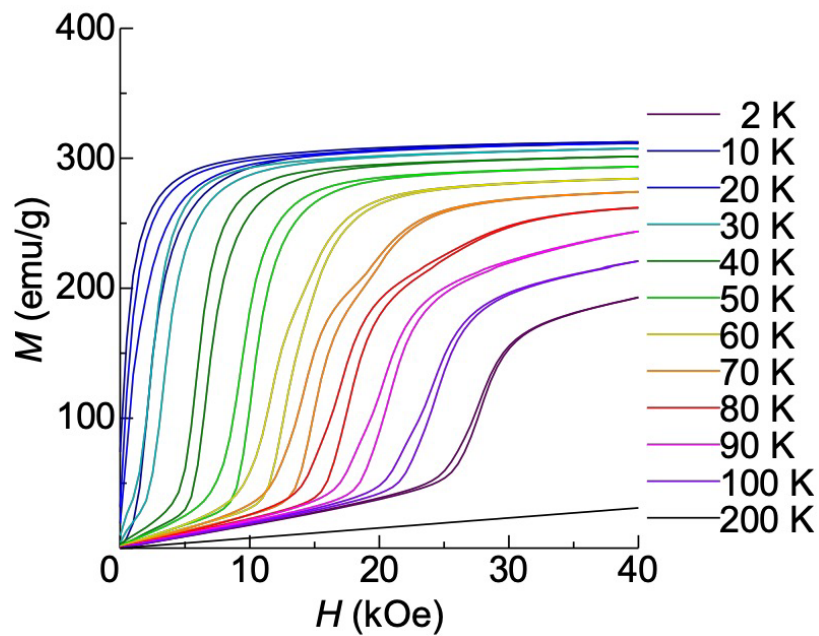

Supplementary Figure 2: Magnetization curve at typical temperature in Ho. These data are identical to those in Fig. 2 in the main text. The unit of magnetization is emu/g.

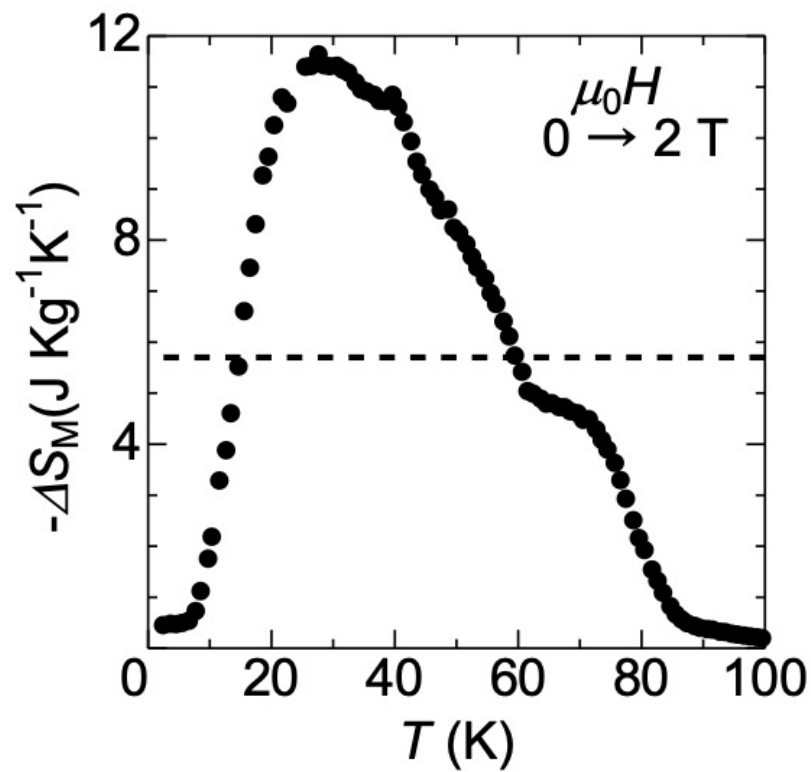

Supplementary Figure 3: Temperature dependence of negative magnetic entropy change for a magnetic field change from  $\mu_0 H = 0$  T to  $\mu_0 H = 2$  T in Ho. From this data, the relative cooling power ( $RCP$ ), defined as  $RCP = \Delta S_M^{\text{max}} \cdot \delta T_{\text{FWHM}}$ , can be estimated to  $RCP \sim 0.5$  kJ/kg in  $\mu_0 H = 2$  T in Ho, where  $\Delta S_M^{\text{max}}$  is the maximum value of  $\Delta S_M$ , and  $\delta T_{\text{FWHM}}$  is a full width at half maximum so-called working temperature span.
